# Supplementary material for: Deep sequencing of small RNAs reveals the repertoire of miRNAs and piRNAs in Biomphalaria glabrata
Source: PubMed Central journal article supplement (PMC7328434; doi:10.1590/0074-02760190498), 2020-07-01
Supplement: 1678-8060-mioc-115-e190498-s1.pdf [file 1678-8060-mioc-115-e190498-s1.pdf]

TABLE I  
TaqMan® assays

| miRNA    | Assay ID   | Assay name   |
|----------|------------|--------------|
| miR-8    | 000269     | dme-miR-8    |
| miR-92   | 241870_mat | dpu-miR-92   |
| miR-184  | 000290     | dme-miR-184  |
| miR-315  | 000325     | dme-miR-315  |
| miR-375  | 007201_mat | aca-miR-375  |
| miR-750  | 008337_mat | cte-miR-750  |
| miR-1984 | 006673_mat | hru-miR-1984 |
| U6 snRNA | 001973     | U6 snRNA     |

TABLE II  
Genome and transcriptome localisation of *Biomphalaria glabrata* miRNAs

| Pre-miRNA     | Contig or scaffold         | Start  | End    | Strand | Database |
|---------------|----------------------------|--------|--------|--------|----------|
| bgl-bantam    | LGUN_random_Scaffold555467 | 2058   | 2133   | minus  | Genome   |
| bgl-let-7     | LGUN_random_Scaffold446    | 100296 | 100363 | minus  | Genome   |
| bgl-miR-1a    | LGUN_random_Scaffold313    | 141974 | 142081 | minus  | Genome   |
| bgl-miR-2a-1  | LG6_random_Scaffold1244    | 15480  | 15569  | plus   | Genome   |
| bgl-miR-2a-2  | LG6_random_Scaffold1244    | 16119  | 16204  | plus   | Genome   |
| bgl-miR-2b    | LG6_random_Scaffold1244    | 15776  | 15874  | plus   | Genome   |
| bgl-miR-2d    | LG6_random_Scaffold1244    | 15674  | 15762  | plus   | Genome   |
| bgl-miR-7     | LGUN_random_Scaffold1659   | 33266  | 33359  | plus   | Genome   |
| bgl-miR-8     | LG3_random_Scaffold555     | 179139 | 179237 | minus  | Genome   |
| bgl-miR-9a    | LGUN_random_Scaffold370    | 127677 | 127751 | minus  | Genome   |
| bgl-miR-9b    | LGUN_random_Scaffold370    | 127677 | 127751 | plus   | Genome   |
| bgl-miR-12    | LGUN_random_Scaffold18     | 762312 | 762388 | plus   | Genome   |
| bgl-miR-29a   | LGUN_random_Scaffold532    | 101201 | 101301 | minus  | Genome   |
| bgl-miR-29b   | LGUN_random_Scaffold532    | 117297 | 117383 | minus  | Genome   |
| bgl-miR-33    | LGUN_random_Scaffold1923   | 29991  | 30077  | plus   | Genome   |
| bgl-miR-34    | LG26_random_Scaffold796    | 58910  | 58997  | plus   | Genome   |
| bgl-miR-36a   | LGUN_random_Scaffold551705 | 952    | 1043   | plus   | Genome   |
| bgl-miR-67-1  | LGUN_random_Scaffold175600 | 277    | 358    | minus  | Genome   |
| bgl-miR-67-2  | LGUN_random_Scaffold6774   | 14221  | 14302  | minus  | Genome   |
| bgl-miR-71    | LG6_random_Scaffold1244    | 15354  | 15442  | plus   | Genome   |
| bgl-miR-72    | LG24_random_Scaffold169    | 50436  | 50520  | plus   | Genome   |
| bgl-miR-87b-1 | LGUN_random_Scaffold538    | 17530  | 17635  | minus  | Genome   |
| bgl-miR-87b-2 | LGUN_random_Scaffold538    | 21935  | 22033  | minus  | Genome   |
| bgl-miR-92    | LGUN_random_Scaffold36250  | 1201   | 1300   | minus  | Genome   |
| bgl-miR-92a   | LGUN_random_Scaffold4152   | 19817  | 19905  | minus  | Genome   |
| bgl-miR-92a-1 | LGUN_random_Scaffold4152   | 20211  | 20307  | minus  | Genome   |
| bgl-miR-92b   | LGUN_random_Scaffold36250  | 103    | 192    | minus  | Genome   |
| bgl-miR-96a   | LGUN_random_Scaffold45     | 468626 | 468699 | plus   | Genome   |

| Pre-miRNA     | Contig or scaffold         | Start  | End    | Strand | Database |
|---------------|----------------------------|--------|--------|--------|----------|
| bgl-miR-96b   | LG4_random_Scaffold36      | 489389 | 489476 | plus   | Genome   |
| bgl-miR-100   | LGUN_random_Scaffold446    | 93669  | 93762  | minus  | Genome   |
| bgl-miR-124   | LGUN_random_Scaffold540242 | 3321   | 3417   | minus  | Genome   |
| bgl-miR-125   | LGUN_random_Scaffold446    | 104272 | 104360 | minus  | Genome   |
| bgl-miR-133   | LGUN_random_Scaffold313    | 111956 | 112046 | minus  | Genome   |
| bgl-miR-137   | LGUN_random_Scaffold162    | 214432 | 214517 | minus  | Genome   |
| bgl-miR-153   | LGUN_random_Scaffold671    | 116601 | 116698 | minus  | Genome   |
| bgl-miR-184   | LGUN_random_Scaffold26723  | 1552   | 1675   | plus   | Genome   |
| bgl-miR-190   | LG2_random_Scaffold42      | 62684  | 62774  | minus  | Genome   |
| bgl-miR-193   | LG2_random_Scaffold42      | 420501 | 420584 | minus  | Genome   |
| bgl-miR-199a  | LGUN_random_Scaffold26964  | 1961   | 2054   | minus  | Genome   |
| bgl-miR-216a  | LGUN_random_Scaffold18     | 759287 | 759363 | plus   | Genome   |
| bgl-miR-216b  | LGUN_random_Scaffold18     | 757131 | 757202 | plus   | Genome   |
| bgl-miR-219a  | LGUN_random_Scaffold276    | 211507 | 211604 | minus  | Genome   |
| bgl-miR-252a  | LGUN_random_Scaffold20250  | 2987   | 3085   | minus  | Genome   |
| bgl-miR-252b  | LGUN_random_Scaffold7055   | 558    | 648    | minus  | Genome   |
| bgl-miR-277a  | LG26_random_Scaffold796    | 46625  | 46724  | plus   | Genome   |
| bgl-miR-278   | LGUN_random_Scaffold5083   | 7879   | 7980   | plus   | Genome   |
| bgl-miR-279   | LGUN_random_Scaffold3355   | 16180  | 16272  | plus   | Genome   |
| bgl-miR-281   | LG24_random_Scaffold115    | 29213  | 29283  | plus   | Genome   |
| bgl-miR-315   | LGUN_random_Scaffold550284 | 2385   | 2464   | minus  | Genome   |
| bgl-miR-317   | LG26_random_Scaffold796    | 31870  | 31967  | plus   | Genome   |
| bgl-miR-375   | LGUN_random_Scaffold682    | 129296 | 129395 | minus  | Genome   |
| bgl-miR-745a  | LGUN_random_Scaffold1067   | 13642  | 13735  | minus  | Genome   |
| bgl-miR-745b  | LGUN_random_Scaffold1067   | 13253  | 13328  | minus  | Genome   |
| bgl-miR-750   | LGUN_random_Scaffold448    | 178337 | 178436 | minus  | Genome   |
| bgl-miR-981   | LGUN_random_Scaffold2747   | 35119  | 35200  | plus   | Genome   |
| bgl-miR-1175  | LGUN_random_Scaffold448    | 170932 | 171027 | minus  | Genome   |
| bgl-miR-1260  | LGUN_random_Scaffold121    | 296099 | 296174 | plus   | Genome   |
| bgl-miR-1984  | LG3_random_Scaffold688     | 139863 | 139942 | minus  | Genome   |
| bgl-miR-1985  | LG3_random_Scaffold688     | 136038 | 136125 | minus  | Genome   |
| bgl-miR-1986  | LGUN_random_Scaffold828    | 164246 | 164322 | plus   | Genome   |
| bgl-miR-1990  | LGUN_random_Scaffold828    | 160164 | 160258 | plus   | Genome   |
| bgl-miR-1991  | LGUN_random_Scaffold2012   | 1834   | 1928   | plus   | Genome   |
| bgl-miR-1992  | LGUN_random_Scaffold126    | 219037 | 219133 | minus  | Genome   |
| bgl-miR-1993  | LGUN_random_Scaffold24466  | 814    | 884    | minus  | Genome   |
| bgl-miR-1994a | LGUN_random_Scaffold2100   | 47010  | 47095  | minus  | Genome   |
| bgl-miR-1994b | LGUN_random_Scaffold2100   | 46368  | 46454  | minus  | Genome   |
| bgl-miR-2001  | LGUN_random_Scaffold7055   | 11299  | 11398  | minus  | Genome   |
| bgl-miR-2722  | LGUN_random_Scaffold2019   | 53436  | 53507  | plus   | Genome   |

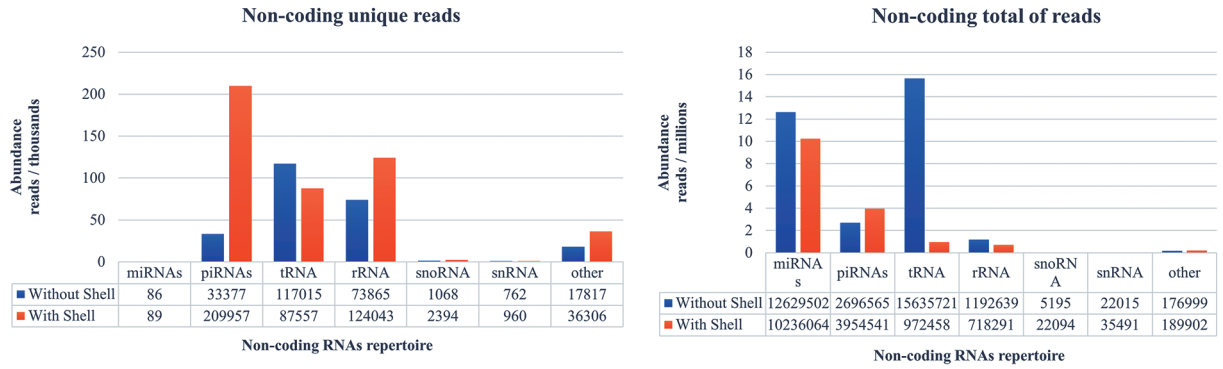

Fig. 1: profile of small RNAs of *Biomphalaria glabrata* compared to Rfam database. (A) unique reads for *B. glabrata* small RNA sequencing with and without shell. (B) total of reads for *B. glabrata* small RNA sequencing with and without shell.

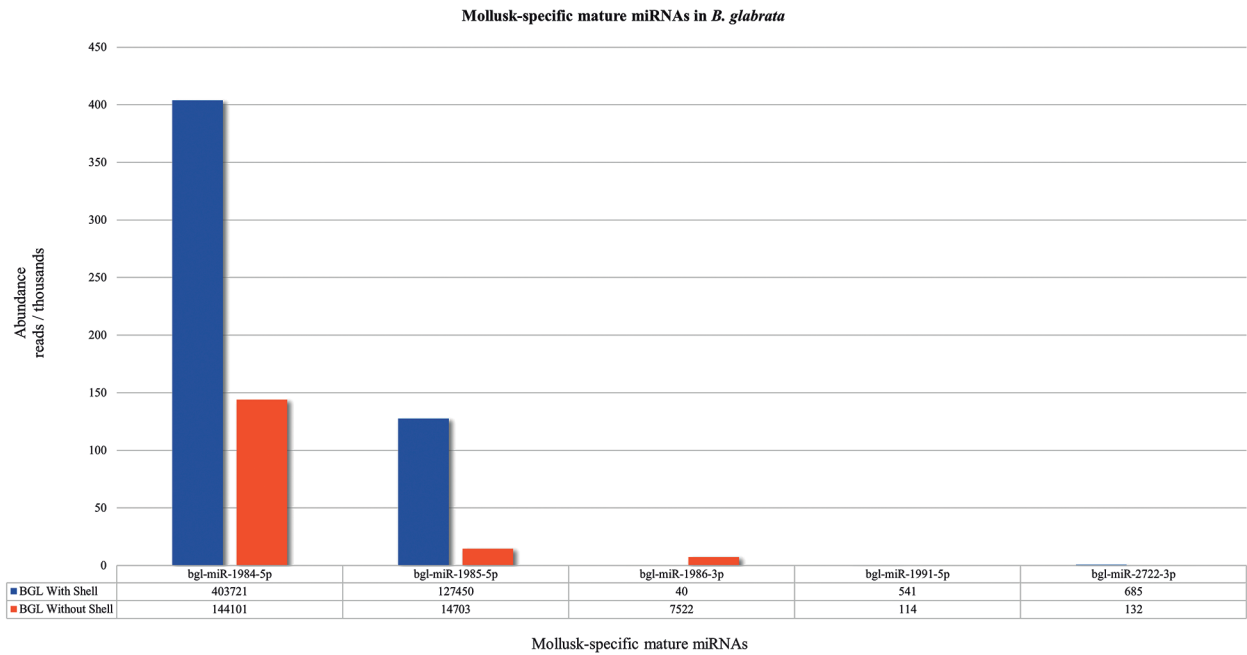

Fig. 2: characterisation of mollusk-specific miRNAs in *Biomphalaria glabrata*. The abundance of mature miRNAs shows a large difference between samples with and without shell, except for bgl-miR-1986-3p that is more representative on mollusks without shell.

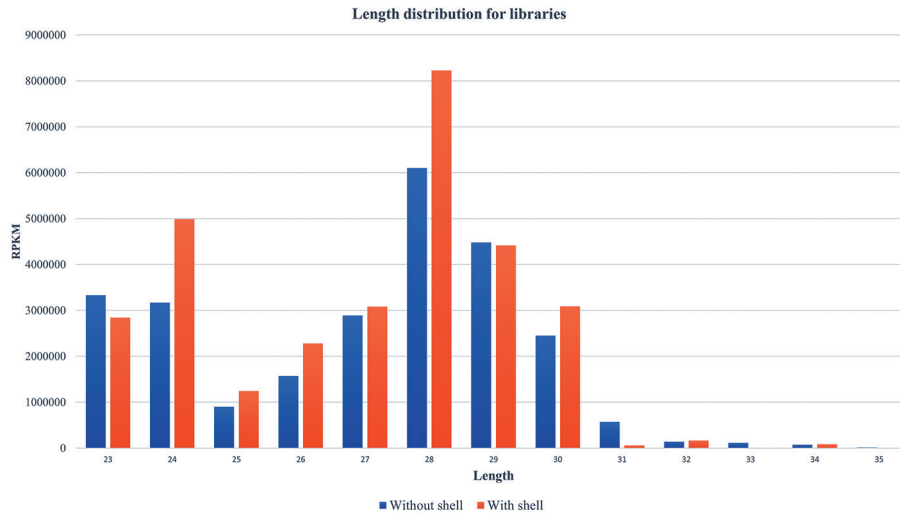

Fig. 3: length distribution at the range of Bgl-piRNAs for small-RNAseq libraries. The libraries of small-RNAseq of *Biomphalaria glabrata* filtered at the range of 23 to 35 nucleotides with large distribution of the reads of 28 and 29 nucleotides.

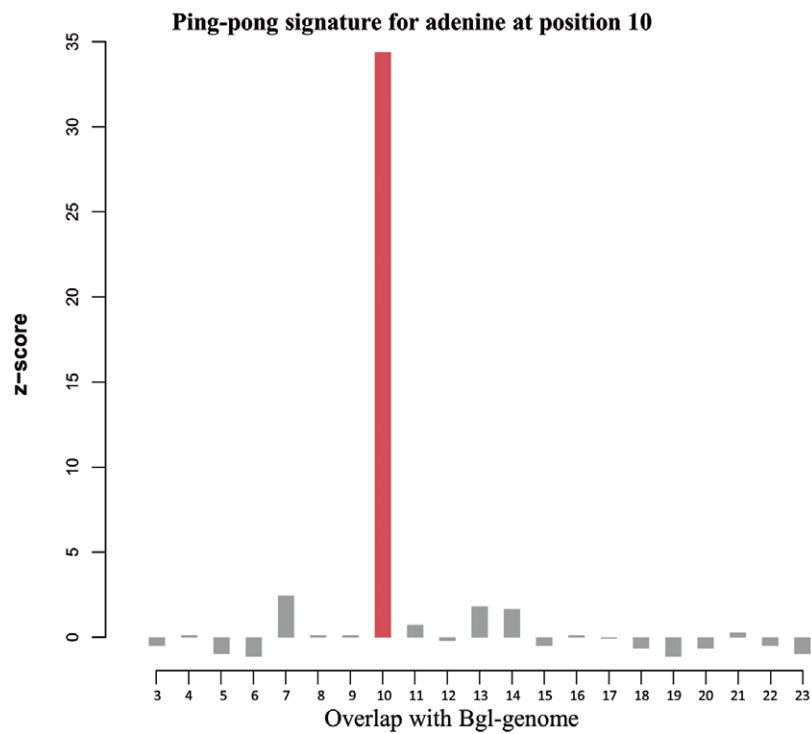

Fig. 4: ping-pong signature for putative Bgl-piRNAs with genome of *Biomphalaria glabrata*. Strong signature of ping-pong cycle with high score for overlapping of Bgl-piRNAs on *B. glabrata* genome with adenine at tenth position.
